# Supplementary material
Source: HighWire-hosted journal article supplement (http://ajnr-stage2.highwire.org/highwire/filestream/52381/field_highwire_adjunct_files/0/3279_table.pdf)
Supplement: 3279_table.pdf [file 3279_table.pdf]

| On-line Table: Patients with prenatal findings of brain injury |                                                      |             |                                         |                        |                                         |                                                              |                                                                                |
|----------------------------------------------------------------|------------------------------------------------------|-------------|-----------------------------------------|------------------------|-----------------------------------------|--------------------------------------------------------------|--------------------------------------------------------------------------------|
| Group Patient No. <sup>a</sup>                                 | Intervention during Pregnancy (week)                 | IUFD (week) | Brain US Findings (day)                 | Doppler Findings (day) | DWI Findings (days after fetal death)   | MRI T2 Findings (week)                                       | Outcome (Follow-Up)                                                            |
| A.1                                                            | None                                                 | 36          | None                                    | Elevated MCA-PSV (2)   | Positive; recent posterior infarct (2)  | Brain edema                                                  | TOP                                                                            |
| A.2                                                            | None                                                 | 32          | None                                    | None                   | Positive; unilateral recent infarct (4) | Contralateral previous infarct                               | Delivered at 36 weeks; motor deficiencies (1 yr)                               |
| A.3                                                            | None                                                 | 25          | Hydrops (6)                             | Elevated MCA-PSV (6)   | None (6)                                | None                                                         | Normal                                                                         |
| B.1                                                            | Laser for TTTS stage II (18)                         | 23          | None                                    | None                   | Positive; temporal lobe infarct (4)     | None                                                         | TOP                                                                            |
| B.2                                                            | Laser for TTTS stage II (21)                         | 22          | None                                    | None                   | Suspected GM bleeding (5)               | Bilateral periventricular hypointense signal                 | TOP                                                                            |
| B.3                                                            | Laser for TTTS stage III (24)                        | 24          | None                                    | None                   | GM bleeding (1)                         | GM bleeding seen also at 27 weeks                            | Delivery 32 weeks; necrotizing enterocolitis; normal neurodevelopment (1.5 yr) |
| C.1                                                            | RFA selective termination of sIUGR (22)              | 22          | Normal (1); later ventriculomegaly (15) | None                   | Bilateral cerebral ischemia (1)         | Normal; Later (3) developed to bilateral cerebral ischemia   | TOP                                                                            |
| C.2                                                            | Bipolar selective termination of sIUGR (21)          | 21          | None                                    | None                   | GM bleeding (5)                         | Normal; then suspected GM bleeding (25), which resolved (32) | A/W 1.5 yr                                                                     |
| C.3                                                            | Bipolar selective termination of TTTS stage III (23) | 23          | None                                    | None                   | Focal changes in basal ganglia (4)      | Focal hypointense signal in BG                               | A/W 2.5 yr                                                                     |

**Note:**—A/W indicates alive and well; BG, basal ganglia; TOP, termination of pregnancy; GM, germinal matrix; PSV, peak systolic velocity; sIUGR, selective intrauterine growth restriction.  
<sup>a</sup> A indicates spontaneous fetal death of 1 fetus. Imaging findings in 3/6 fetuses. B is IUFD after laser termination for TTTS. Imaging findings in 3/10 fetuses. C is selective termination. Imaging findings in 3/18 fetuses.
